# Supplementary material
Source: publisher figshare collection journal article supplement (https://acs.figshare.com/ndownloader/files/4029067)
Supplement: Supplementary file 1 [file 4029067]

#======================================================================== 

# 1. SUBMISSION DETAILS

_publ_contact_author          
;
      Liu,Yunling
      College of Chemistry
      Jilin University
      Changchun, 130012
      P. R. China
;
_publ_contact_author_phone  '86-431-85168614'
_publ_contact_author_fax    '86-431-85168624'
_publ_contact_author_email  'yunling@jlu.edu.cn'
_publ_requested_journal     
_publ_requested_coeditor_name     ?
 

#======================================================================== 
  
data_compound1 
 
_audit_creation_method            SHELXL-97 
_chemical_name_systematic 
; 
 ? 
; 
_chemical_name_common             ? 
_chemical_melting_point           'not measured' 
_chemical_formula_moiety          'C16 H14 Cd N2 O5' 
_chemical_formula_sum 
 'C16 H14 Cd N2 O5' 
_chemical_formula_weight          426.69 
 
loop_ 
 _atom_type_symbol 
 _atom_type_description 
 _atom_type_scat_dispersion_real 
 _atom_type_scat_dispersion_imag 
 _atom_type_scat_source 
 'C'  'C'   0.0033   0.0016 
 'International Tables Vol C Tables 4.2.6.8 and 6.1.1.4' 
 'H'  'H'   0.0000   0.0000 
 'International Tables Vol C Tables 4.2.6.8 and 6.1.1.4' 
 'N'  'N'   0.0061   0.0033 
 'International Tables Vol C Tables 4.2.6.8 and 6.1.1.4' 
 'O'  'O'   0.0106   0.0060 
 'International Tables Vol C Tables 4.2.6.8 and 6.1.1.4' 
 'Cd'  'Cd'  -0.8075   1.2024 
 'International Tables Vol C Tables 4.2.6.8 and 6.1.1.4' 
 
_symmetry_cell_setting            monoclinic
_symmetry_space_group_name_H-M    P2(1)/c
 
loop_ 
 _symmetry_equiv_pos_as_xyz 
 'x, y, z' 
 '-x, y+1/2, -z+1/2' 
 '-x, -y, -z' 
 'x, -y-1/2, z-1/2' 
 
_cell_length_a                    9.2420(18) 
_cell_length_b                    18.201(4) 
_cell_length_c                    9.7270(19) 
_cell_angle_alpha                 90.00 
_cell_angle_beta                  105.11(3) 
_cell_angle_gamma                 90.00 
_cell_volume                      1579.7(5) 
_cell_formula_units_Z             4 
_cell_measurement_temperature     293(2) 
_cell_measurement_reflns_used     ? 
_cell_measurement_theta_min       ? 
_cell_measurement_theta_max       ? 
 
_exptl_crystal_description        block 
_exptl_crystal_colour             'light yellow'
_exptl_crystal_size_max           0.28 
_exptl_crystal_size_mid           0.23 
_exptl_crystal_size_min           0.21 
_exptl_crystal_density_meas       none 
_exptl_crystal_density_diffrn     1.794 
_exptl_crystal_density_method     'not measured' 
_exptl_crystal_F_000              848 
_exptl_absorpt_coefficient_mu     1.412 
_exptl_absorpt_correction_type    empirical
_exptl_absorpt_correction_T_min   0.6857
_exptl_absorpt_correction_T_max   0.7518
_exptl_absorpt_process_details    'Process-auto' 
 
_exptl_special_details 
; 
 ? 
; 
 
_diffrn_ambient_temperature       293(2) 
_diffrn_radiation_wavelength      0.71073 
_diffrn_radiation_type            MoK\a 
_diffrn_radiation_source          'fine-focus sealed tube' 
_diffrn_radiation_monochromator   graphite 
_diffrn_measurement_device_type   'Rigaku RAXIS-RAPID' 
_diffrn_measurement_method        omega-scan 
_diffrn_detector_area_resol_mean  '10.0' 
_diffrn_standards_number          0 
_diffrn_standards_interval_count  0 
_diffrn_standards_interval_time   0 
_diffrn_standards_decay_%         0 
_diffrn_reflns_number             15181 
_diffrn_reflns_av_R_equivalents   0.0196 
_diffrn_reflns_av_sigmaI/netI     0.0155 
_diffrn_reflns_limit_h_min        -11 
_diffrn_reflns_limit_h_max        11 
_diffrn_reflns_limit_k_min        -23 
_diffrn_reflns_limit_k_max        23 
_diffrn_reflns_limit_l_min        -10 
_diffrn_reflns_limit_l_max        12 
_diffrn_reflns_theta_min          3.12 
_diffrn_reflns_theta_max          27.44 
_reflns_number_total              3587 
_reflns_number_gt                 3216 
_reflns_threshold_expression      >2sigma(I) 
 
_computing_data_collection        'Process-auto' 
_computing_cell_refinement        'Process-auto' 
_computing_data_reduction         'Process-auto'
_computing_structure_solution     'SHELXS-97 (Sheldrick, 1990)' 
_computing_structure_refinement   'SHELXL-97 (Sheldrick, 1997)' 
_computing_molecular_graphics     ? 
_computing_publication_material   ? 
 
_refine_special_details 
; 
 Refinement of F^2^ against ALL reflections.  The weighted R-factor wR and 
 goodness of fit S are based on F^2^, conventional R-factors R are based 
 on F, with F set to zero for negative F^2^. The threshold expression of 
 F^2^ > 2sigma(F^2^) is used only for calculating R-factors(gt) etc. and is 
 not relevant to the choice of reflections for refinement.  R-factors based 
 on F^2^ are statistically about twice as large as those based on F, and R- 
 factors based on ALL data will be even larger. 
; 
 
_refine_ls_structure_factor_coef  Fsqd  
_refine_ls_matrix_type            full 
_refine_ls_weighting_scheme       calc  
_refine_ls_weighting_details 
 'calc w=1/[\s^2^(Fo^2^)+(0.0429P)^2^+3.3612P] where P=(Fo^2^+2Fc^2^)/3' 
_atom_sites_solution_primary      direct 
_atom_sites_solution_secondary    difmap 
_atom_sites_solution_hydrogens    geom 
_refine_ls_hydrogen_treatment     constr 
_refine_ls_extinction_method      none 
_refine_ls_extinction_coef        ? 
_refine_ls_number_reflns          3587 
_refine_ls_number_parameters      217 
_refine_ls_number_restraints      30 
_refine_ls_R_factor_all           0.0348 
_refine_ls_R_factor_gt            0.0315 
_refine_ls_wR_factor_ref          0.0862 
_refine_ls_wR_factor_gt           0.0849 
_refine_ls_goodness_of_fit_ref    1.045 
_refine_ls_restrained_S_all       1.059 
_refine_ls_shift/su_max           0.001 
_refine_ls_shift/su_mean          0.000 
 
loop_ 
 _atom_site_label 
 _atom_site_type_symbol 
 _atom_site_fract_x 
 _atom_site_fract_y 
 _atom_site_fract_z 
 _atom_site_U_iso_or_equiv 
 _atom_site_adp_type 
 _atom_site_occupancy 
 _atom_site_symmetry_multiplicity 
 _atom_site_calc_flag 
 _atom_site_refinement_flags 
 _atom_site_disorder_assembly 
 _atom_site_disorder_group 
Cd1 Cd 0.63363(2) 0.566274(11) 0.93828(2) 0.02607(9) Uani 1 1 d . . . 
O1 O 0.4382(3) 0.59919(13) 0.7490(3) 0.0403(6) Uani 1 1 d . . . 
O2 O 0.5773(3) 0.69438(15) 0.8389(3) 0.0506(7) Uani 1 1 d . . . 
O3 O 0.2312(3) 0.95706(13) 0.4751(3) 0.0399(6) Uani 1 1 d . . . 
O4 O 0.4685(3) 0.93897(12) 0.5921(3) 0.0332(5) Uani 1 1 d . . . 
O5 O 0.7783(4) 0.5538(2) 0.7712(4) 0.0647(9) Uani 1 1 d U . . 
N1 N -0.1739(3) 0.62755(15) 0.0916(3) 0.0307(6) Uani 1 1 d . . . 
N2 N 0.7858(6) 0.5668(2) 0.5447(5) 0.0679(12) Uani 1 1 d U . . 
C1 C -0.0402(4) 0.59464(18) 0.1419(4) 0.0332(7) Uani 1 1 d . . . 
H1 H -0.0239 0.5491 0.1050 0.100 Uiso 1 1 calc . . . 
C2 C 0.0742(4) 0.62598(18) 0.2466(4) 0.0320(7) Uani 1 1 d . . . 
H2 H 0.1652 0.6016 0.2785 0.100 Uiso 1 1 calc . . . 
C3 C 0.0530(3) 0.69397(16) 0.3041(3) 0.0278(6) Uani 1 1 d . . . 
C4 C -0.0849(4) 0.72847(18) 0.2490(4) 0.0368(8) Uani 1 1 d . . . 
H4 H -0.1039 0.7743 0.2830 0.100 Uiso 1 1 calc . . . 
C5 C -0.1930(4) 0.69401(19) 0.1434(4) 0.0366(8) Uani 1 1 d . . . 
H5 H -0.2835 0.7182 0.1066 0.100 Uiso 1 1 calc . . . 
C6 C 0.1719(3) 0.72713(17) 0.4200(3) 0.0268(6) Uani 1 1 d . . . 
C7 C 0.2632(3) 0.68329(15) 0.5249(3) 0.0272(6) Uani 1 1 d . . . 
H7 H 0.2490 0.6327 0.5224 0.100 Uiso 1 1 calc . . . 
C8 C 0.3758(3) 0.71437(16) 0.6338(3) 0.0262(6) Uani 1 1 d . . . 
C9 C 0.4004(3) 0.78966(16) 0.6342(3) 0.0259(6) Uani 1 1 d . . . 
H9 H 0.4777 0.8104 0.7044 0.100 Uiso 1 1 calc . . . 
C10 C 0.3105(3) 0.83410(15) 0.5308(3) 0.0246(6) Uani 1 1 d . . . 
C11 C 0.1941(3) 0.80326(16) 0.4259(3) 0.0270(6) Uani 1 1 d . . . 
H11 H 0.1308 0.8334 0.3594 0.100 Uiso 1 1 calc . . . 
C12 C 0.4712(4) 0.66634(18) 0.7487(3) 0.0313(7) Uani 1 1 d . . . 
C13 C 0.3368(4) 0.91525(16) 0.5318(3) 0.0284(6) Uani 1 1 d . . . 
C14 C 0.7206(7) 0.5556(3) 0.6436(6) 0.0659(13) Uani 1 1 d U . . 
H14 H 0.6176 0.5479 0.6149 0.100 Uiso 1 1 calc . . . 
C15 C 0.7089(11) 0.5676(5) 0.3948(10) 0.113(3) Uani 1 1 d U . . 
H15A H 0.7792 0.5782 0.3402 0.100 Uiso 1 1 calc . . . 
H15B H 0.6323 0.6046 0.3771 0.100 Uiso 1 1 calc . . . 
H15C H 0.6640 0.5204 0.3675 0.100 Uiso 1 1 calc . . . 
C16 C 0.9459(10) 0.5823(5) 0.5823(9) 0.104(2) Uani 1 1 d U . . 
H16A H 0.9779 0.5901 0.4971 0.100 Uiso 1 1 calc . . . 
H16B H 0.9995 0.5414 0.6338 0.100 Uiso 1 1 calc . . . 
H16C H 0.9658 0.6255 0.6407 0.100 Uiso 1 1 calc . . . 
 
loop_ 
 _atom_site_aniso_label 
 _atom_site_aniso_U_11 
 _atom_site_aniso_U_22 
 _atom_site_aniso_U_33 
 _atom_site_aniso_U_23 
 _atom_site_aniso_U_13 
 _atom_site_aniso_U_12 
Cd1 0.02697(13) 0.01853(12) 0.02561(13) 0.00197(8) -0.00583(9) -0.00016(8) 
O1 0.0423(14) 0.0262(11) 0.0419(14) 0.0127(10) -0.0076(11) 0.0032(10) 
O2 0.0489(16) 0.0404(14) 0.0433(15) 0.0082(12) -0.0221(12) 0.0008(12) 
O3 0.0388(13) 0.0206(10) 0.0526(16) 0.0021(10) -0.0022(12) 0.0032(10) 
O4 0.0379(13) 0.0243(11) 0.0322(12) -0.0022(9) -0.0002(10) -0.0099(9) 
O5 0.0650(12) 0.0692(12) 0.0603(12) 0.0011(9) 0.0173(9) 0.0054(9) 
N1 0.0287(13) 0.0265(13) 0.0297(13) -0.0004(10) -0.0052(11) -0.0036(11) 
N2 0.0694(14) 0.0697(14) 0.0647(14) 0.0020(9) 0.0178(10) -0.0044(9) 
C1 0.0318(17) 0.0281(15) 0.0352(17) -0.0055(13) 0.0006(14) -0.0017(13) 
C2 0.0252(15) 0.0284(15) 0.0362(17) -0.0028(13) -0.0030(13) -0.0002(12) 
C3 0.0271(14) 0.0224(14) 0.0274(15) 0.0025(11) -0.0047(12) -0.0056(12) 
C4 0.0334(17) 0.0230(14) 0.044(2) -0.0042(13) -0.0072(15) 0.0011(13) 
C5 0.0306(16) 0.0291(16) 0.0399(19) -0.0010(13) -0.0090(14) 0.0025(13) 
C6 0.0246(14) 0.0218(14) 0.0279(15) 0.0007(11) -0.0037(12) -0.0026(11) 
C7 0.0295(15) 0.0175(13) 0.0294(15) 0.0032(11) -0.0016(12) -0.0030(11) 
C8 0.0252(14) 0.0221(14) 0.0264(15) 0.0032(11) -0.0022(12) 0.0011(11) 
C9 0.0234(14) 0.0235(14) 0.0246(14) 0.0005(11) -0.0048(11) -0.0018(11) 
C10 0.0257(14) 0.0174(13) 0.0269(14) 0.0013(11) 0.0001(11) -0.0009(11) 
C11 0.0271(14) 0.0195(13) 0.0282(15) 0.0040(11) -0.0040(12) -0.0006(11) 
C12 0.0306(16) 0.0294(15) 0.0285(16) 0.0066(12) -0.0020(13) 0.0060(13) 
C13 0.0353(16) 0.0190(13) 0.0272(15) 0.0000(11) 0.0017(13) -0.0034(12) 
C14 0.0667(15) 0.0670(15) 0.0642(15) 0.0008(10) 0.0174(10) 0.0003(10) 
C15 0.113(3) 0.113(3) 0.111(3) 0.0014(10) 0.0290(12) -0.0013(10) 
C16 0.104(2) 0.105(2) 0.103(2) -0.0006(10) 0.0279(11) -0.0014(10) 
 
_geom_special_details 
; 
 All esds (except the esd in the dihedral angle between two l.s. planes) 
 are estimated using the full covariance matrix.  The cell esds are taken 
 into account individually in the estimation of esds in distances, angles 
 and torsion angles; correlations between esds in cell parameters are only 
 used when they are defined by crystal symmetry.  An approximate (isotropic) 
 treatment of cell esds is used for estimating esds involving l.s. planes. 
; 
 
loop_ 
 _geom_bond_atom_site_label_1 
 _geom_bond_atom_site_label_2 
 _geom_bond_distance 
 _geom_bond_site_symmetry_2 
 _geom_bond_publ_flag 
Cd1 N1 2.291(3) 1_656 ? 
Cd1 O1 2.297(2) . ? 
Cd1 O5 2.369(4) . ? 
Cd1 O3 2.382(2) 2_646 ? 
Cd1 O4 2.401(3) 4_576 ? 
Cd1 O4 2.490(2) 2_646 ? 
Cd1 O2 2.526(3) . ? 
Cd1 C12 2.744(3) . ? 
O1 C12 1.260(4) . ? 
O2 C12 1.243(4) . ? 
O3 C13 1.247(4) . ? 
O3 Cd1 2.382(2) 2_656 ? 
O4 C13 1.281(4) . ? 
O4 Cd1 2.401(3) 4_575 ? 
O4 Cd1 2.490(2) 2_656 ? 
O5 C14 1.217(6) . ? 
N1 C5 1.340(4) . ? 
N1 C1 1.345(4) . ? 
N1 Cd1 2.291(3) 1_454 ? 
N2 C14 1.278(7) . ? 
N2 C15 1.446(10) . ? 
N2 C16 1.456(11) . ? 
C1 C2 1.385(4) . ? 
C1 H1 0.9300 . ? 
C2 C3 1.393(4) . ? 
C2 H2 0.9300 . ? 
C3 C4 1.396(4) . ? 
C3 C6 1.482(4) . ? 
C4 C5 1.383(5) . ? 
C4 H4 0.9300 . ? 
C5 H5 0.9300 . ? 
C6 C7 1.393(4) . ? 
C6 C11 1.400(4) . ? 
C7 C8 1.396(4) . ? 
C7 H7 0.9300 . ? 
C8 C9 1.389(4) . ? 
C8 C12 1.509(4) . ? 
C9 C10 1.386(4) . ? 
C9 H9 0.9300 . ? 
C10 C11 1.393(4) . ? 
C10 C13 1.496(4) . ? 
C11 H11 0.9300 . ? 
C14 H14 0.9300 . ? 
C15 H15A 0.9600 . ? 
C15 H15B 0.9600 . ? 
C15 H15C 0.9600 . ? 
C16 H16A 0.9600 . ? 
C16 H16B 0.9600 . ? 
C16 H16C 0.9600 . ? 
 
loop_ 
 _geom_angle_atom_site_label_1 
 _geom_angle_atom_site_label_2 
 _geom_angle_atom_site_label_3 
 _geom_angle 
 _geom_angle_site_symmetry_1 
 _geom_angle_site_symmetry_3 
 _geom_angle_publ_flag 
N1 Cd1 O1 135.20(9) 1_656 . ? 
N1 Cd1 O5 90.68(12) 1_656 . ? 
O1 Cd1 O5 86.67(12) . . ? 
N1 Cd1 O3 85.94(9) 1_656 2_646 ? 
O1 Cd1 O3 137.01(9) . 2_646 ? 
O5 Cd1 O3 79.89(11) . 2_646 ? 
N1 Cd1 O4 97.21(10) 1_656 4_576 ? 
O1 Cd1 O4 90.87(9) . 4_576 ? 
O5 Cd1 O4 170.91(11) . 4_576 ? 
O3 Cd1 O4 96.11(9) 2_646 4_576 ? 
N1 Cd1 O4 137.40(9) 1_656 2_646 ? 
O1 Cd1 O4 87.31(8) . 2_646 ? 
O5 Cd1 O4 95.36(11) . 2_646 ? 
O3 Cd1 O4 54.07(8) 2_646 2_646 ? 
O4 Cd1 O4 75.77(9) 4_576 2_646 ? 
N1 Cd1 O2 81.22(9) 1_656 . ? 
O1 Cd1 O2 53.99(8) . . ? 
O5 Cd1 O2 85.59(12) . . ? 
O3 Cd1 O2 160.47(10) 2_646 . ? 
O4 Cd1 O2 100.03(9) 4_576 . ? 
O4 Cd1 O2 141.22(8) 2_646 . ? 
N1 Cd1 C12 108.08(10) 1_656 . ? 
O1 Cd1 C12 27.13(9) . . ? 
O5 Cd1 C12 84.87(12) . . ? 
O3 Cd1 C12 159.44(10) 2_646 . ? 
O4 Cd1 C12 96.89(9) 4_576 . ? 
O4 Cd1 C12 114.44(9) 2_646 . ? 
O2 Cd1 C12 26.87(9) . . ? 
C12 O1 Cd1 96.6(2) . . ? 
C12 O2 Cd1 86.4(2) . . ? 
C13 O3 Cd1 94.3(2) . 2_656 ? 
C13 O4 Cd1 112.6(2) . 4_575 ? 
C13 O4 Cd1 88.48(19) . 2_656 ? 
Cd1 O4 Cd1 104.23(9) 4_575 2_656 ? 
C14 O5 Cd1 121.4(4) . . ? 
C5 N1 C1 117.6(3) . . ? 
C5 N1 Cd1 121.9(2) . 1_454 ? 
C1 N1 Cd1 120.3(2) . 1_454 ? 
C14 N2 C15 123.8(6) . . ? 
C14 N2 C16 119.3(6) . . ? 
C15 N2 C16 116.9(6) . . ? 
N1 C1 C2 122.5(3) . . ? 
N1 C1 H1 118.8 . . ? 
C2 C1 H1 118.8 . . ? 
C1 C2 C3 120.1(3) . . ? 
C1 C2 H2 120.0 . . ? 
C3 C2 H2 120.0 . . ? 
C2 C3 C4 117.1(3) . . ? 
C2 C3 C6 120.9(3) . . ? 
C4 C3 C6 122.1(3) . . ? 
C5 C4 C3 119.5(3) . . ? 
C5 C4 H4 120.3 . . ? 
C3 C4 H4 120.3 . . ? 
N1 C5 C4 123.3(3) . . ? 
N1 C5 H5 118.4 . . ? 
C4 C5 H5 118.4 . . ? 
C7 C6 C11 118.8(3) . . ? 
C7 C6 C3 120.8(3) . . ? 
C11 C6 C3 120.4(3) . . ? 
C6 C7 C8 120.9(3) . . ? 
C6 C7 H7 119.6 . . ? 
C8 C7 H7 119.6 . . ? 
C9 C8 C7 119.4(3) . . ? 
C9 C8 C12 120.4(3) . . ? 
C7 C8 C12 120.2(3) . . ? 
C10 C9 C8 120.5(3) . . ? 
C10 C9 H9 119.8 . . ? 
C8 C9 H9 119.8 . . ? 
C9 C10 C11 119.9(3) . . ? 
C9 C10 C13 120.4(3) . . ? 
C11 C10 C13 119.7(3) . . ? 
C10 C11 C6 120.4(3) . . ? 
C10 C11 H11 119.8 . . ? 
C6 C11 H11 119.8 . . ? 
O2 C12 O1 122.9(3) . . ? 
O2 C12 C8 119.1(3) . . ? 
O1 C12 C8 118.0(3) . . ? 
O2 C12 Cd1 66.72(18) . . ? 
O1 C12 Cd1 56.26(16) . . ? 
C8 C12 Cd1 173.8(2) . . ? 
O3 C13 O4 122.5(3) . . ? 
O3 C13 C10 119.5(3) . . ? 
O4 C13 C10 118.0(3) . . ? 
O5 C14 N2 127.2(6) . . ? 
O5 C14 H14 116.4 . . ? 
N2 C14 H14 116.4 . . ? 
N2 C15 H15A 109.5 . . ? 
N2 C15 H15B 109.5 . . ? 
H15A C15 H15B 109.5 . . ? 
N2 C15 H15C 109.5 . . ? 
H15A C15 H15C 109.5 . . ? 
H15B C15 H15C 109.5 . . ? 
N2 C16 H16A 109.5 . . ? 
N2 C16 H16B 109.5 . . ? 
H16A C16 H16B 109.5 . . ? 
N2 C16 H16C 109.5 . . ? 
H16A C16 H16C 109.5 . . ? 
H16B C16 H16C 109.5 . . ? 
 
_diffrn_measured_fraction_theta_max    0.994 
_diffrn_reflns_theta_full              27.44 
_diffrn_measured_fraction_theta_full   0.994 
_refine_diff_density_max    0.936 
_refine_diff_density_min   -0.877 
_refine_diff_density_rms    0.094 

#=================================================================end


data_compound2 

  
 
_audit_creation_method            SHELXL-97 
_chemical_name_systematic 
; 
 ? 
; 
_chemical_name_common             ? 
_chemical_melting_point           'not measured' 
_chemical_formula_moiety          'C17 H15 Cd N O6'  
_chemical_formula_sum 
 'C17 H15 Cd N O6' 
_chemical_formula_weight          441.70 
 
loop_ 
 _atom_type_symbol 
 _atom_type_description 
 _atom_type_scat_dispersion_real 
 _atom_type_scat_dispersion_imag 
 _atom_type_scat_source 
 'C'  'C'   0.0033   0.0016 
 'International Tables Vol C Tables 4.2.6.8 and 6.1.1.4' 
 'H'  'H'   0.0000   0.0000 
 'International Tables Vol C Tables 4.2.6.8 and 6.1.1.4' 
 'N'  'N'   0.0061   0.0033 
 'International Tables Vol C Tables 4.2.6.8 and 6.1.1.4' 
 'O'  'O'   0.0106   0.0060 
 'International Tables Vol C Tables 4.2.6.8 and 6.1.1.4' 
 'Cd'  'Cd'  -0.8075   1.2024 
 'International Tables Vol C Tables 4.2.6.8 and 6.1.1.4' 
 
_symmetry_cell_setting            monoclinic
_symmetry_space_group_name_H-M    c2/c
 
loop_ 
 _symmetry_equiv_pos_as_xyz 
 'x, y, z' 
 '-x, y, -z+1/2' 
 'x+1/2, y+1/2, z' 
 '-x+1/2, y+1/2, -z+1/2' 
 '-x, -y, -z' 
 'x, -y, z-1/2' 
 '-x+1/2, -y+1/2, -z' 
 'x+1/2, -y+1/2, z-1/2' 
 
_cell_length_a                    10.170(2) 
_cell_length_b                    20.659(4) 
_cell_length_c                    7.6720(15) 
_cell_angle_alpha                 90.00 
_cell_angle_beta                  104.26(3) 
_cell_angle_gamma                 90.00 
_cell_volume                      1562.2(5) 
_cell_formula_units_Z             4 
_cell_measurement_temperature     293(2) 
_cell_measurement_reflns_used     ? 
_cell_measurement_theta_min       ? 
_cell_measurement_theta_max       ? 
 
_exptl_crystal_description        block 
_exptl_crystal_colour             colourless
_exptl_crystal_size_max           0.24 
_exptl_crystal_size_mid           0.21 
_exptl_crystal_size_min           0.20
_exptl_crystal_density_meas       none
_exptl_crystal_density_diffrn     1.878 
_exptl_crystal_density_method     'not measured' 
_exptl_crystal_F_000              880 
_exptl_absorpt_coefficient_mu     1.434 
_exptl_absorpt_correction_type    none 
_exptl_absorpt_correction_T_min   ? 
_exptl_absorpt_correction_T_max   ? 
_exptl_absorpt_process_details    ? 
 
_exptl_special_details 
; 
 ? 
; 
 
_diffrn_ambient_temperature       293(2) 
_diffrn_radiation_wavelength      0.71073 
_diffrn_radiation_type            MoK\a 
_diffrn_radiation_source          'fine-focus sealed tube' 
_diffrn_radiation_monochromator   graphite 
_diffrn_measurement_device_type   'Rigaku RAXIS-RAPID' 
_diffrn_measurement_method        omega-scan 
_diffrn_detector_area_resol_mean  '10.0' 
_diffrn_standards_number          0 
_diffrn_standards_interval_count  0 
_diffrn_standards_interval_time   0 
_diffrn_standards_decay_%         0 
_diffrn_reflns_number             7595 
_diffrn_reflns_av_R_equivalents   0.0272 
_diffrn_reflns_av_sigmaI/netI     0.0223 
_diffrn_reflns_limit_h_min        -12 
_diffrn_reflns_limit_h_max        13 
_diffrn_reflns_limit_k_min        -26 
_diffrn_reflns_limit_k_max        26 
_diffrn_reflns_limit_l_min        -9 
_diffrn_reflns_limit_l_max        8 
_diffrn_reflns_theta_min          3.16 
_diffrn_reflns_theta_max          27.42 
_reflns_number_total              1766 
_reflns_number_gt                 1698 
_reflns_threshold_expression      >2sigma(I) 
 
_computing_data_collection        'Process-auto' 
_computing_cell_refinement        'Process-auto' 
_computing_data_reduction         'Process-auto'
_computing_structure_solution     'SHELXS-97 (Sheldrick, 1990)' 
_computing_structure_refinement   'SHELXL-97 (Sheldrick, 1997)' 
_computing_molecular_graphics     ? 
_computing_publication_material   ? 
 
_refine_special_details 
; 
 Refinement of F^2^ against ALL reflections.  The weighted R-factor wR and 
 goodness of fit S are based on F^2^, conventional R-factors R are based 
 on F, with F set to zero for negative F^2^. The threshold expression of 
 F^2^ > 2sigma(F^2^) is used only for calculating R-factors(gt) etc. and is 
 not relevant to the choice of reflections for refinement.  R-factors based 
 on F^2^ are statistically about twice as large as those based on F, and R- 
 factors based on ALL data will be even larger. 
; 
 
_refine_ls_structure_factor_coef  Fsqd  
_refine_ls_matrix_type            full 
_refine_ls_weighting_scheme       calc  
_refine_ls_weighting_details 
 'calc w=1/[\s^2^(Fo^2^)+(0.0243P)^2^+3.3386P] where P=(Fo^2^+2Fc^2^)/3' 
_atom_sites_solution_primary      direct 
_atom_sites_solution_secondary    difmap 
_atom_sites_solution_hydrogens    geom 
_refine_ls_hydrogen_treatment     constr 
_refine_ls_extinction_method      none 
_refine_ls_extinction_coef        ? 
_refine_ls_number_reflns          1766 
_refine_ls_number_parameters      116 
_refine_ls_number_restraints      0 
_refine_ls_R_factor_all           0.0235 
_refine_ls_R_factor_gt            0.0223 
_refine_ls_wR_factor_ref          0.0592 
_refine_ls_wR_factor_gt           0.0587 
_refine_ls_goodness_of_fit_ref    1.156 
_refine_ls_restrained_S_all       1.156 
_refine_ls_shift/su_max           0.000 
_refine_ls_shift/su_mean          0.000 
 
loop_ 
 _atom_site_label 
 _atom_site_type_symbol 
 _atom_site_fract_x 
 _atom_site_fract_y 
 _atom_site_fract_z 
 _atom_site_U_iso_or_equiv 
 _atom_site_adp_type 
 _atom_site_occupancy 
 _atom_site_symmetry_multiplicity 
 _atom_site_calc_flag 
 _atom_site_refinement_flags 
 _atom_site_disorder_assembly 
 _atom_site_disorder_group 
Cd1 Cd 0.5000 0.644615(10) 0.7500 0.02032(9) Uani 1 2 d S . . 
O1 O 0.65867(18) 0.56627(9) 0.7960(3) 0.0382(4) Uani 1 1 d . . . 
O2 O 0.7481(2) 0.65886(9) 0.7432(3) 0.0421(5) Uani 1 1 d . . . 
O3 O 0.5275(2) 0.64586(8) 1.0772(2) 0.0323(4) Uani 1 1 d . . . 
N1 N 1.0000 0.25479(12) 0.7500 0.0233(5) Uani 1 2 d S . . 
C1 C 0.8838(2) 0.28842(11) 0.7076(4) 0.0283(5) Uani 1 1 d . . . 
H1 H 0.8023 0.2658 0.6792 0.080 Uiso 1 1 calc . . . 
C2 C 0.8801(2) 0.35496(11) 0.7044(4) 0.0287(5) Uani 1 1 d . . . 
H2 H 0.7971 0.3763 0.6717 0.080 Uiso 1 1 calc . . . 
C3 C 1.0000 0.39051(14) 0.7500 0.0207(6) Uani 1 2 d S . . 
C4 C 1.0000 0.46234(14) 0.7500 0.0211(6) Uani 1 2 d S . . 
C5 C 0.8848(2) 0.49668(10) 0.7627(3) 0.0221(4) Uani 1 1 d . . . 
H5 H 0.8075 0.4743 0.7721 0.080 Uiso 1 1 calc . . . 
C6 C 0.8838(2) 0.56407(10) 0.7614(3) 0.0227(4) Uani 1 1 d . . . 
C7 C 1.0000 0.59732(14) 0.7500 0.0232(6) Uani 1 2 d S . . 
H7 H 1.0000 0.6423 0.7500 0.080 Uiso 1 2 calc S . . 
C8 C 0.7558(2) 0.59869(11) 0.7693(3) 0.0268(5) Uani 1 1 d . . . 
C9 C 0.4780(4) 0.70257(14) 1.1487(4) 0.0434(7) Uani 1 1 d . . . 
H9A H 0.3797 0.7036 1.1104 0.080 Uiso 1 1 calc . . . 
H9B H 0.5125 0.7410 1.1024 0.080 Uiso 1 1 calc . . . 
C10 C 0.4789(3) 0.58863(14) 1.1482(4) 0.0409(7) Uani 1 1 d . . . 
H10A H 0.5154 0.5505 1.1028 0.080 Uiso 1 1 calc . . . 
H10B H 0.3808 0.5869 1.1082 0.080 Uiso 1 1 calc . . . 
 
loop_ 
 _atom_site_aniso_label 
 _atom_site_aniso_U_11 
 _atom_site_aniso_U_22 
 _atom_site_aniso_U_33 
 _atom_site_aniso_U_23 
 _atom_site_aniso_U_13 
 _atom_site_aniso_U_12 
Cd1 0.01850(12) 0.01454(12) 0.03006(14) 0.000 0.01005(9) 0.000 
O1 0.0241(9) 0.0340(10) 0.0600(13) 0.0003(9) 0.0172(9) 0.0072(7) 
O2 0.0365(10) 0.0220(9) 0.0684(14) 0.0000(9) 0.0138(10) 0.0127(8) 
O3 0.0399(10) 0.0334(10) 0.0272(9) -0.0015(7) 0.0149(8) 0.0014(7) 
N1 0.0254(14) 0.0133(11) 0.0330(15) 0.000 0.0107(12) 0.000 
C1 0.0209(11) 0.0183(10) 0.0459(15) -0.0017(9) 0.0087(10) -0.0037(8) 
C2 0.0188(11) 0.0182(11) 0.0486(15) 0.0006(9) 0.0075(10) 0.0008(8) 
C3 0.0201(14) 0.0165(13) 0.0267(16) 0.000 0.0081(12) 0.000 
C4 0.0169(14) 0.0151(13) 0.0323(17) 0.000 0.0078(12) 0.000 
C5 0.0175(10) 0.0162(10) 0.0336(12) 0.0003(8) 0.0083(9) 0.0007(8) 
C6 0.0210(11) 0.0164(10) 0.0304(12) -0.0011(8) 0.0058(9) 0.0034(8) 
C7 0.0261(16) 0.0090(12) 0.0335(17) 0.000 0.0052(13) 0.000 
C8 0.0241(11) 0.0248(11) 0.0301(12) -0.0033(9) 0.0041(10) 0.0099(9) 
C9 0.068(2) 0.0345(14) 0.0333(16) 0.0041(11) 0.0236(15) 0.0069(13) 
C10 0.0600(19) 0.0329(14) 0.0308(15) -0.0017(11) 0.0131(13) -0.0056(13) 
 
_geom_special_details 
; 
 All esds (except the esd in the dihedral angle between two l.s. planes) 
 are estimated using the full covariance matrix.  The cell esds are taken 
 into account individually in the estimation of esds in distances, angles 
 and torsion angles; correlations between esds in cell parameters are only 
 used when they are defined by crystal symmetry.  An approximate (isotropic) 
 treatment of cell esds is used for estimating esds involving l.s. planes. 
; 
 
loop_ 
 _geom_bond_atom_site_label_1 
 _geom_bond_atom_site_label_2 
 _geom_bond_distance 
 _geom_bond_site_symmetry_2 
 _geom_bond_publ_flag 
Cd1 O1 2.2512(18) 2_656 ? 
Cd1 O1 2.2512(18) . ? 
Cd1 N1 2.276(3) 3_455 ? 
Cd1 O3 2.4564(19) . ? 
Cd1 O3 2.4564(19) 2_656 ? 
Cd1 O2 2.554(2) . ? 
Cd1 O2 2.554(2) 2_656 ? 
Cd1 C8 2.738(2) 2_656 ? 
Cd1 C8 2.738(2) . ? 
O1 C8 1.251(3) . ? 
O2 C8 1.258(3) . ? 
O3 C9 1.437(3) . ? 
O3 C10 1.439(3) . ? 
N1 C1 1.340(3) 2_756 ? 
N1 C1 1.340(3) . ? 
N1 Cd1 2.276(3) 3_545 ? 
C1 C2 1.375(3) . ? 
C1 H1 0.9300 . ? 
C2 C3 1.393(3) . ? 
C2 H2 0.9300 . ? 
C3 C2 1.393(3) 2_756 ? 
C3 C4 1.484(4) . ? 
C4 C5 1.394(3) 2_756 ? 
C4 C5 1.394(3) . ? 
C5 C6 1.392(3) . ? 
C5 H5 0.9300 . ? 
C6 C7 1.388(3) . ? 
C6 C8 1.500(3) . ? 
C7 C6 1.388(3) 2_756 ? 
C7 H7 0.9300 . ? 
C9 C9 1.508(6) 2_657 ? 
C9 H9A 0.9700 . ? 
C9 H9B 0.9700 . ? 
C10 C10 1.515(6) 2_657 ? 
C10 H10A 0.9700 . ? 
C10 H10B 0.9700 . ? 
 
loop_ 
 _geom_angle_atom_site_label_1 
 _geom_angle_atom_site_label_2 
 _geom_angle_atom_site_label_3 
 _geom_angle 
 _geom_angle_site_symmetry_1 
 _geom_angle_site_symmetry_3 
 _geom_angle_publ_flag 
O1 Cd1 O1 88.06(10) 2_656 . ? 
O1 Cd1 N1 135.97(5) 2_656 3_455 ? 
O1 Cd1 N1 135.97(5) . 3_455 ? 
O1 Cd1 O3 93.69(7) 2_656 . ? 
O1 Cd1 O3 87.17(7) . . ? 
N1 Cd1 O3 89.40(4) 3_455 . ? 
O1 Cd1 O3 87.17(7) 2_656 2_656 ? 
O1 Cd1 O3 93.69(7) . 2_656 ? 
N1 Cd1 O3 89.40(4) 3_455 2_656 ? 
O3 Cd1 O3 178.80(8) . 2_656 ? 
O1 Cd1 O2 138.89(7) 2_656 . ? 
O1 Cd1 O2 54.01(7) . . ? 
N1 Cd1 O2 83.38(4) 3_455 . ? 
O3 Cd1 O2 98.94(8) . . ? 
O3 Cd1 O2 80.92(8) 2_656 . ? 
O1 Cd1 O2 54.01(7) 2_656 2_656 ? 
O1 Cd1 O2 138.89(7) . 2_656 ? 
N1 Cd1 O2 83.38(4) 3_455 2_656 ? 
O3 Cd1 O2 80.92(8) . 2_656 ? 
O3 Cd1 O2 98.94(8) 2_656 2_656 ? 
O2 Cd1 O2 166.76(8) . 2_656 ? 
O1 Cd1 C8 26.84(7) 2_656 2_656 ? 
O1 Cd1 C8 113.21(7) . 2_656 ? 
N1 Cd1 C8 110.27(5) 3_455 2_656 ? 
O3 Cd1 C8 85.78(8) . 2_656 ? 
O3 Cd1 C8 94.64(8) 2_656 2_656 ? 
O2 Cd1 C8 165.71(7) . 2_656 ? 
O2 Cd1 C8 27.23(7) 2_656 2_656 ? 
O1 Cd1 C8 113.21(7) 2_656 . ? 
O1 Cd1 C8 26.84(7) . . ? 
N1 Cd1 C8 110.27(5) 3_455 . ? 
O3 Cd1 C8 94.64(8) . . ? 
O3 Cd1 C8 85.78(8) 2_656 . ? 
O2 Cd1 C8 27.23(7) . . ? 
O2 Cd1 C8 165.71(7) 2_656 . ? 
C8 Cd1 C8 139.46(10) 2_656 . ? 
C8 O1 Cd1 98.84(15) . . ? 
C8 O2 Cd1 84.57(15) . . ? 
C9 O3 C10 109.9(2) . . ? 
C9 O3 Cd1 115.88(15) . . ? 
C10 O3 Cd1 114.51(15) . . ? 
C1 N1 C1 117.5(3) 2_756 . ? 
C1 N1 Cd1 121.24(13) 2_756 3_545 ? 
C1 N1 Cd1 121.24(13) . 3_545 ? 
N1 C1 C2 122.8(2) . . ? 
N1 C1 H1 118.6 . . ? 
C2 C1 H1 118.6 . . ? 
C1 C2 C3 120.2(2) . . ? 
C1 C2 H2 119.9 . . ? 
C3 C2 H2 119.9 . . ? 
C2 C3 C2 116.3(3) . 2_756 ? 
C2 C3 C4 121.83(14) . . ? 
C2 C3 C4 121.83(14) 2_756 . ? 
C5 C4 C5 118.8(3) 2_756 . ? 
C5 C4 C3 120.61(14) 2_756 . ? 
C5 C4 C3 120.61(14) . . ? 
C6 C5 C4 120.9(2) . . ? 
C6 C5 H5 119.6 . . ? 
C4 C5 H5 119.6 . . ? 
C7 C6 C5 119.4(2) . . ? 
C7 C6 C8 121.8(2) . . ? 
C5 C6 C8 118.8(2) . . ? 
C6 C7 C6 120.7(3) . 2_756 ? 
C6 C7 H7 119.6 . . ? 
C6 C7 H7 119.6 2_756 . ? 
O1 C8 O2 122.3(2) . . ? 
O1 C8 C6 118.6(2) . . ? 
O2 C8 C6 119.0(2) . . ? 
O1 C8 Cd1 54.33(12) . . ? 
O2 C8 Cd1 68.20(14) . . ? 
C6 C8 Cd1 170.27(16) . . ? 
O3 C9 C9 110.5(2) . 2_657 ? 
O3 C9 H9A 109.5 . . ? 
C9 C9 H9A 109.5 2_657 . ? 
O3 C9 H9B 109.5 . . ? 
C9 C9 H9B 109.5 2_657 . ? 
H9A C9 H9B 108.1 . . ? 
O3 C10 C10 110.7(2) . 2_657 ? 
O3 C10 H10A 109.5 . . ? 
C10 C10 H10A 109.5 2_657 . ? 
O3 C10 H10B 109.5 . . ? 
C10 C10 H10B 109.5 2_657 . ? 
H10A C10 H10B 108.1 . . ? 
 
_diffrn_measured_fraction_theta_max    0.993 
_diffrn_reflns_theta_full              27.42 
_diffrn_measured_fraction_theta_full   0.993 
_refine_diff_density_max    0.551 
_refine_diff_density_min   -0.308 
_refine_diff_density_rms    0.089 

#=================================================================end


data_compound3 

   
_audit_creation_method            SHELXL-97 
_chemical_name_systematic 
; 
 ? 
; 
_chemical_name_common             ? 
_chemical_melting_point           'not measured' 
_chemical_formula_moiety          'C17 H11 Cd N3 O4'  
_chemical_formula_sum 
 'C17 H11 Cd N3 O4' 
_chemical_formula_weight          433.69 
 
loop_ 
 _atom_type_symbol 
 _atom_type_description 
 _atom_type_scat_dispersion_real 
 _atom_type_scat_dispersion_imag 
 _atom_type_scat_source 
 'C'  'C'   0.0033   0.0016 
 'International Tables Vol C Tables 4.2.6.8 and 6.1.1.4' 
 'H'  'H'   0.0000   0.0000 
 'International Tables Vol C Tables 4.2.6.8 and 6.1.1.4' 
 'N'  'N'   0.0061   0.0033 
 'International Tables Vol C Tables 4.2.6.8 and 6.1.1.4' 
 'O'  'O'   0.0106   0.0060 
 'International Tables Vol C Tables 4.2.6.8 and 6.1.1.4' 
 'Cd'  'Cd'  -0.8075   1.2024 
 'International Tables Vol C Tables 4.2.6.8 and 6.1.1.4' 
 
_symmetry_cell_setting            Orthorhombic 
_symmetry_space_group_name_H-M    CmCm
 
loop_ 
 _symmetry_equiv_pos_as_xyz 
 'x, y, z' 
 '-x, -y, z+1/2' 
 '-x, y, -z+1/2' 
 'x, -y, -z' 
 'x+1/2, y+1/2, z' 
 '-x+1/2, -y+1/2, z+1/2' 
 '-x+1/2, y+1/2, -z+1/2' 
 'x+1/2, -y+1/2, -z' 
 '-x, -y, -z' 
 'x, y, -z-1/2' 
 'x, -y, z-1/2' 
 '-x, y, z' 
 '-x+1/2, -y+1/2, -z' 
 'x+1/2, y+1/2, -z-1/2' 
 'x+1/2, -y+1/2, z-1/2' 
 '-x+1/2, y+1/2, z' 
 
_cell_length_a                    10.226(2) 
_cell_length_b                    20.706(4) 
_cell_length_c                    7.5525(15) 
_cell_angle_alpha                 90.00 
_cell_angle_beta                  90.00 
_cell_angle_gamma                 90.00 
_cell_volume                      1599.1(5) 
_cell_formula_units_Z             4 
_cell_measurement_temperature     293(2) 
_cell_measurement_reflns_used     ? 
_cell_measurement_theta_min       ? 
_cell_measurement_theta_max       ? 
 
_exptl_crystal_description        block 
_exptl_crystal_colour             colourless 
_exptl_crystal_size_max           0.21 
_exptl_crystal_size_mid           0.18 
_exptl_crystal_size_min           0.14 
_exptl_crystal_density_meas       none 
_exptl_crystal_density_diffrn     1.801 
_exptl_crystal_density_method     'not measured' 
_exptl_crystal_F_000              856 
_exptl_absorpt_coefficient_mu     1.394 
_exptl_absorpt_correction_type    empirical 
_exptl_absorpt_correction_T_min   0.7541
_exptl_absorpt_correction_T_max   0.8594
_exptl_absorpt_process_details    'Process-auto'
 
_exptl_special_details 
; 
 ? 
; 
 
_diffrn_ambient_temperature       293(2) 
_diffrn_radiation_wavelength      0.71073 
_diffrn_radiation_type            MoK\a 
_diffrn_radiation_source          'fine-focus sealed tube' 
_diffrn_radiation_monochromator   graphite 
_diffrn_measurement_device_type   'Rigaku RAXIS-RAPID' 
_diffrn_measurement_method        omega-scan 
_diffrn_detector_area_resol_mean  '10.0' 
_diffrn_standards_number          0 
_diffrn_standards_interval_count  0 
_diffrn_standards_interval_time   0 
_diffrn_standards_decay_%         0  
_diffrn_reflns_number             6254 
_diffrn_reflns_av_R_equivalents   0.0843 
_diffrn_reflns_av_sigmaI/netI     0.0594 
_diffrn_reflns_limit_h_min        -12 
_diffrn_reflns_limit_h_max        10 
_diffrn_reflns_limit_k_min        -24 
_diffrn_reflns_limit_k_max        24 
_diffrn_reflns_limit_l_min        -8 
_diffrn_reflns_limit_l_max        8 
_diffrn_reflns_theta_min          3.34 
_diffrn_reflns_theta_max          25.00 
_reflns_number_total              808 
_reflns_number_gt                 701 
_reflns_threshold_expression      >2sigma(I) 
 
_computing_data_collection        'Process-auto' 
_computing_cell_refinement        'Process-auto' 
_computing_data_reduction         'Process-auto'
_computing_structure_solution     'SHELXS-97 (Sheldrick, 1990)' 
_computing_structure_refinement   'SHELXL-97 (Sheldrick, 1997)' 
_computing_molecular_graphics     'SHELXS-97 (Sheldrick, 1990)' 
_computing_publication_material   'SHELXS-97 (Sheldrick, 1990)' 
 
_refine_special_details 
; 
 Refinement of F^2^ against ALL reflections.  The weighted R-factor wR and 
 goodness of fit S are based on F^2^, conventional R-factors R are based 
 on F, with F set to zero for negative F^2^. The threshold expression of 
 F^2^ > 2sigma(F^2^) is used only for calculating R-factors(gt) etc. and is 
 not relevant to the choice of reflections for refinement.  R-factors based 
 on F^2^ are statistically about twice as large as those based on F, and R- 
 factors based on ALL data will be even larger. 
; 
 
_refine_ls_structure_factor_coef  Fsqd  
_refine_ls_matrix_type            full 
_refine_ls_weighting_scheme       calc  
_refine_ls_weighting_details 
 'calc w=1/[\s^2^(Fo^2^)+(0.0393P)^2^+9.7758P] where P=(Fo^2^+2Fc^2^)/3' 
_atom_sites_solution_primary      direct 
_atom_sites_solution_secondary    difmap 
_atom_sites_solution_hydrogens    geom 
_refine_ls_hydrogen_treatment     mixed 
_refine_ls_extinction_method      none 
_refine_ls_extinction_coef        ? 
_refine_ls_number_reflns          808 
_refine_ls_number_parameters      93 
_refine_ls_number_restraints      1 
_refine_ls_R_factor_all           0.0590 
_refine_ls_R_factor_gt            0.0447 
_refine_ls_wR_factor_ref          0.1011 
_refine_ls_wR_factor_gt           0.0968 
_refine_ls_goodness_of_fit_ref    1.067 
_refine_ls_restrained_S_all       1.066 
_refine_ls_shift/su_max           0.000 
_refine_ls_shift/su_mean          0.000 
 
loop_ 
 _atom_site_label 
 _atom_site_type_symbol 
 _atom_site_fract_x 
 _atom_site_fract_y 
 _atom_site_fract_z 
 _atom_site_U_iso_or_equiv 
 _atom_site_adp_type 
 _atom_site_occupancy 
 _atom_site_symmetry_multiplicity 
 _atom_site_calc_flag 
 _atom_site_refinement_flags 
 _atom_site_disorder_assembly 
 _atom_site_disorder_group 
Cd1 Cd 0.5000 0.35655(3) 0.2500 0.0406(3) Uani 1 4 d S . . 
O1 O 0.3493(6) 0.4361(3) 0.2500 0.0673(18) Uani 1 2 d S . . 
O2 O 0.2502(6) 0.3423(2) 0.2500 0.0708(19) Uani 1 2 d S . . 
N1 N 0.0000 0.7456(4) 0.2500 0.046(2) Uani 1 4 d S . . 
N2 N 0.5000 0.3556(3) -0.0663(10) 0.0580(19) Uani 1 2 d S . . 
C1 C 0.0000 0.4039(4) 0.2500 0.042(3) Uani 1 4 d S . . 
H1 H 0.0000 0.3590 0.2500 0.080 Uiso 1 4 calc S . . 
C2 C 0.1172(6) 0.4367(3) 0.2500 0.0412(18) Uani 1 2 d S . . 
C3 C 0.1169(7) 0.5041(3) 0.2500 0.0414(18) Uani 1 2 d S . . 
H3 H 0.1958 0.5265 0.2500 0.080 Uiso 1 2 calc S . . 
C4 C 0.0000 0.5379(4) 0.2500 0.034(2) Uani 1 4 d S . . 
C5 C -0.1039(10) 0.7123(4) 0.1938(15) 0.049(4) Uani 0.50 1 d P . . 
C6 C -0.1069(9) 0.6443(4) 0.1900(15) 0.048(4) Uani 0.50 1 d P . . 
C7 C 0.0000 0.6103(4) 0.2500 0.038(3) Uani 1 4 d S . . 
C8 C 0.2473(8) 0.4030(3) 0.2500 0.049(2) Uani 1 2 d S . . 
C9 C 0.5000 0.4086(4) -0.1603(13) 0.071(3) Uani 1 2 d S . . 
H9 H 0.5000 0.4481 -0.1014 0.080 Uiso 1 2 calc S . . 
C10 C 0.4544(11) 0.3035(5) -0.1603(16) 0.057(3) Uani 0.50 1 d PD . . 
H10 H 0.431(11) 0.265(3) -0.088(13) 0.080 Uiso 0.50 1 d PD . . 
 
loop_ 
 _atom_site_aniso_label 
 _atom_site_aniso_U_11 
 _atom_site_aniso_U_22 
 _atom_site_aniso_U_33 
 _atom_site_aniso_U_23 
 _atom_site_aniso_U_13 
 _atom_site_aniso_U_12 
Cd1 0.0364(5) 0.0221(4) 0.0634(6) 0.000 0.000 0.000 
O1 0.038(3) 0.042(3) 0.121(6) 0.000 0.000 0.008(3) 
O2 0.054(4) 0.030(3) 0.129(6) 0.000 0.000 0.015(3) 
N1 0.036(5) 0.017(4) 0.083(7) 0.000 0.000 0.000 
N2 0.069(5) 0.038(4) 0.067(5) -0.002(4) 0.000 0.000 
C1 0.053(7) 0.019(4) 0.055(7) 0.000 0.000 0.000 
C2 0.024(4) 0.026(3) 0.073(5) 0.000 0.000 0.003(3) 
C3 0.030(4) 0.030(4) 0.064(5) 0.000 0.000 -0.003(3) 
C4 0.031(5) 0.024(5) 0.048(6) 0.000 0.000 0.000 
C5 0.046(6) 0.025(4) 0.077(12) -0.003(4) -0.013(5) 0.001(4) 
C6 0.033(5) 0.020(4) 0.090(12) 0.001(5) -0.009(5) 0.005(4) 
C7 0.030(5) 0.025(5) 0.059(7) 0.000 0.000 0.000 
C8 0.051(5) 0.029(4) 0.068(6) 0.000 0.000 0.010(4) 
C9 0.101(8) 0.043(5) 0.070(6) -0.008(4) 0.000 0.000 
C10 0.062(9) 0.051(6) 0.057(7) 0.011(5) 0.003(6) -0.007(5) 
 
_geom_special_details 
; 
 All esds (except the esd in the dihedral angle between two l.s. planes) 
 are estimated using the full covariance matrix.  The cell esds are taken 
 into account individually in the estimation of esds in distances, angles 
 and torsion angles; correlations between esds in cell parameters are only 
 used when they are defined by crystal symmetry.  An approximate (isotropic) 
 treatment of cell esds is used for estimating esds involving l.s. planes. 
; 
 
loop_ 
 _geom_bond_atom_site_label_1 
 _geom_bond_atom_site_label_2 
 _geom_bond_distance 
 _geom_bond_site_symmetry_2 
 _geom_bond_publ_flag 
Cd1 O1 2.255(5) 3_655 ? 
Cd1 O1 2.255(5) . ? 
Cd1 N1 2.297(8) 5_545 ? 
Cd1 N2 2.389(8) 10_556 ? 
Cd1 N2 2.389(8) . ? 
Cd1 O2 2.571(6) . ? 
Cd1 O2 2.571(6) 3_655 ? 
Cd1 C8 2.758(8) 3_655 ? 
Cd1 C8 2.758(8) . ? 
O1 C8 1.248(9) . ? 
O2 C8 1.256(8) . ? 
N1 C5 1.336(11) . ? 
N1 C5 1.336(11) 10_556 ? 
N1 C5 1.336(11) 3 ? 
N1 C5 1.336(11) 12 ? 
N1 Cd1 2.297(8) 5_455 ? 
N2 C9 1.307(11) . ? 
N2 C10 1.373(12) . ? 
N2 C10 1.373(12) 12_655 ? 
C1 C2 1.377(8) . ? 
C1 C2 1.377(8) 3 ? 
C1 H1 0.9300 . ? 
C2 C3 1.396(10) . ? 
C2 C8 1.502(10) . ? 
C3 C4 1.385(8) . ? 
C3 H3 0.9300 . ? 
C4 C3 1.385(8) 3 ? 
C4 C7 1.499(12) . ? 
C5 C5 0.85(2) 10_556 ? 
C5 C6 1.408(12) . ? 
C5 C6 1.659(13) 10_556 ? 
C6 C6 0.91(2) 10_556 ? 
C6 C7 1.377(10) . ? 
C6 C5 1.659(13) 10_556 ? 
C7 C6 1.377(10) 3 ? 
C7 C6 1.377(10) 10_556 ? 
C7 C6 1.377(10) 12 ? 
C9 C9 1.36(2) 10 ? 
C9 H9 0.9300 . ? 
C10 C10 0.93(2) 12_655 ? 
C10 C10 1.36(2) 10 ? 
C10 C10 1.65(2) 3_654 ? 
C10 H10 1.00(2) . ? 
 
loop_ 
 _geom_angle_atom_site_label_1 
 _geom_angle_atom_site_label_2 
 _geom_angle_atom_site_label_3 
 _geom_angle 
 _geom_angle_site_symmetry_1 
 _geom_angle_site_symmetry_3 
 _geom_angle_publ_flag 
O1 Cd1 O1 86.2(3) 3_655 . ? 
O1 Cd1 N1 136.90(15) 3_655 5_545 ? 
O1 Cd1 N1 136.90(15) . 5_545 ? 
O1 Cd1 N2 90.33(11) 3_655 10_556 ? 
O1 Cd1 N2 90.33(11) . 10_556 ? 
N1 Cd1 N2 89.54(15) 5_545 10_556 ? 
O1 Cd1 N2 90.33(11) 3_655 . ? 
O1 Cd1 N2 90.33(11) . . ? 
N1 Cd1 N2 89.54(15) 5_545 . ? 
N2 Cd1 N2 179.1(3) 10_556 . ? 
O1 Cd1 O2 139.67(19) 3_655 . ? 
O1 Cd1 O2 53.46(19) . . ? 
N1 Cd1 O2 83.43(11) 5_545 . ? 
N2 Cd1 O2 89.948(18) 10_556 . ? 
N2 Cd1 O2 89.948(18) . . ? 
O1 Cd1 O2 53.46(19) 3_655 3_655 ? 
O1 Cd1 O2 139.67(19) . 3_655 ? 
N1 Cd1 O2 83.43(11) 5_545 3_655 ? 
N2 Cd1 O2 89.948(18) 10_556 3_655 ? 
N2 Cd1 O2 89.948(18) . 3_655 ? 
O2 Cd1 O2 166.9(2) . 3_655 ? 
O1 Cd1 C8 26.5(2) 3_655 3_655 ? 
O1 Cd1 C8 112.7(2) . 3_655 ? 
N1 Cd1 C8 110.41(16) 5_545 3_655 ? 
N2 Cd1 C8 90.16(5) 10_556 3_655 ? 
N2 Cd1 C8 90.16(5) . 3_655 ? 
O2 Cd1 C8 166.2(2) . 3_655 ? 
O2 Cd1 C8 26.97(19) 3_655 3_655 ? 
O1 Cd1 C8 112.7(2) 3_655 . ? 
O1 Cd1 C8 26.5(2) . . ? 
N1 Cd1 C8 110.41(16) 5_545 . ? 
N2 Cd1 C8 90.16(5) 10_556 . ? 
N2 Cd1 C8 90.16(5) . . ? 
O2 Cd1 C8 26.97(19) . . ? 
O2 Cd1 C8 166.2(2) 3_655 . ? 
C8 Cd1 C8 139.2(3) 3_655 . ? 
C8 O1 Cd1 99.8(4) . . ? 
C8 O2 Cd1 84.8(5) . . ? 
C5 N1 C5 37.1(10) . 10_556 ? 
C5 N1 C5 117.9(10) . 3 ? 
C5 N1 C5 105.4(10) 10_556 3 ? 
C5 N1 C5 105.4(10) . 12 ? 
C5 N1 C5 117.9(10) 10_556 12 ? 
C5 N1 C5 37.1(10) 3 12 ? 
C5 N1 Cd1 121.1(5) . 5_455 ? 
C5 N1 Cd1 121.1(5) 10_556 5_455 ? 
C5 N1 Cd1 121.1(5) 3 5_455 ? 
C5 N1 Cd1 121.1(5) 12 5_455 ? 
C9 N2 C10 112.3(8) . . ? 
C9 N2 C10 112.3(8) . 12_655 ? 
C10 N2 C10 39.7(10) . 12_655 ? 
C9 N2 Cd1 122.4(6) . . ? 
C10 N2 Cd1 121.5(6) . . ? 
C10 N2 Cd1 121.5(6) 12_655 . ? 
C2 C1 C2 120.9(8) . 3 ? 
C2 C1 H1 119.5 . . ? 
C2 C1 H1 119.5 3 . ? 
C1 C2 C3 119.4(6) . . ? 
C1 C2 C8 122.8(6) . . ? 
C3 C2 C8 117.8(6) . . ? 
C4 C3 C2 120.5(6) . . ? 
C4 C3 H3 119.8 . . ? 
C2 C3 H3 119.8 . . ? 
C3 C4 C3 119.3(9) . 3 ? 
C3 C4 C7 120.4(4) . . ? 
C3 C4 C7 120.4(4) 3 . ? 
C5 C5 N1 71.5(5) 10_556 . ? 
C5 C5 C6 91.2(7) 10_556 . ? 
N1 C5 C6 122.6(9) . . ? 
C5 C5 C6 58.1(5) 10_556 10_556 ? 
N1 C5 C6 106.5(8) . 10_556 ? 
C6 C5 C6 33.1(8) . 10_556 ? 
C6 C6 C7 70.8(5) 10_556 . ? 
C6 C6 C5 88.8(7) 10_556 . ? 
C7 C6 C5 119.2(9) . . ? 
C6 C6 C5 58.1(5) 10_556 10_556 ? 
C7 C6 C5 104.2(8) . 10_556 ? 
C5 C6 C5 30.8(8) . 10_556 ? 
C6 C7 C6 105.0(9) 3 10_556 ? 
C6 C7 C6 38.4(10) 3 12 ? 
C6 C7 C6 118.4(10) 10_556 12 ? 
C6 C7 C6 118.4(10) 3 . ? 
C6 C7 C6 38.4(10) 10_556 . ? 
C6 C7 C6 105.0(9) 12 . ? 
C6 C7 C4 120.8(5) 3 . ? 
C6 C7 C4 120.8(5) 10_556 . ? 
C6 C7 C4 120.8(5) 12 . ? 
C6 C7 C4 120.8(5) . . ? 
O1 C8 O2 121.9(8) . . ? 
O1 C8 C2 119.0(6) . . ? 
O2 C8 C2 119.1(8) . . ? 
O1 C8 Cd1 53.7(4) . . ? 
O2 C8 Cd1 68.2(5) . . ? 
C2 C8 Cd1 172.7(5) . . ? 
N2 C9 C9 122.9(5) . 10 ? 
N2 C9 H9 118.6 . . ? 
C9 C9 H9 118.6 10 . ? 
C10 C10 C10 90.000(3) 12_655 10 ? 
C10 C10 N2 70.1(5) 12_655 . ? 
C10 C10 N2 121.1(6) 10 . ? 
C10 C10 C10 55.4(8) 12_655 3_654 ? 
C10 C10 C10 34.6(8) 10 3_654 ? 
N2 C10 C10 103.5(8) . 3_654 ? 
C10 C10 H10 104(7) 12_655 . ? 
C10 C10 H10 123(7) 10 . ? 
N2 C10 H10 116(7) . . ? 
C10 C10 H10 126(7) 3_654 . ? 
 
_diffrn_measured_fraction_theta_max    0.998 
_diffrn_reflns_theta_full              25.00 
_diffrn_measured_fraction_theta_full   0.998 
_refine_diff_density_max    0.616 
_refine_diff_density_min   -1.178 
_refine_diff_density_rms    0.140 

#=================================================================end

data_compound4

_audit_creation_method            SHELXL-97 
_chemical_name_systematic 
; 
 ? 
; 
_chemical_name_common             ? 
_chemical_melting_point           'not measured' 
_chemical_formula_moiety          'C23 H16 Cd N3 O4.50' 
_chemical_formula_sum 
 'C23 H16 Cd N3 O4.50' 
_chemical_formula_weight          518.79 
 
loop_ 
 _atom_type_symbol 
 _atom_type_description 
 _atom_type_scat_dispersion_real 
 _atom_type_scat_dispersion_imag 
 _atom_type_scat_source 
 'C'  'C'   0.0033   0.0016 
 'International Tables Vol C Tables 4.2.6.8 and 6.1.1.4' 
 'H'  'H'   0.0000   0.0000 
 'International Tables Vol C Tables 4.2.6.8 and 6.1.1.4' 
 'N'  'N'   0.0061   0.0033 
 'International Tables Vol C Tables 4.2.6.8 and 6.1.1.4' 
 'O'  'O'   0.0106   0.0060 
 'International Tables Vol C Tables 4.2.6.8 and 6.1.1.4' 
 'Cd'  'Cd'  -0.8075   1.2024 
 'International Tables Vol C Tables 4.2.6.8 and 6.1.1.4' 
 
_symmetry_cell_setting            monoclinic 
_symmetry_space_group_name_H-M    C2/m 
 
loop_ 
 _symmetry_equiv_pos_as_xyz 
 'x, y, z' 
 '-x, y, -z' 
 'x+1/2, y+1/2, z' 
 '-x+1/2, y+1/2, -z' 
 '-x, -y, -z' 
 'x, -y, z' 
 '-x+1/2, -y+1/2, -z' 
 'x+1/2, -y+1/2, z' 
 
_cell_length_a                    20.827(4) 
_cell_length_b                    10.148(2) 
_cell_length_c                    11.790(2) 
_cell_angle_alpha                 90.00 
_cell_angle_beta                  105.86(3) 
_cell_angle_gamma                 90.00 
_cell_volume                      2397.1(8) 
_cell_formula_units_Z             4 
_cell_measurement_temperature     293(2) 
_cell_measurement_reflns_used     ? 
_cell_measurement_theta_min       ? 
_cell_measurement_theta_max       ? 
 
_exptl_crystal_description        block
_exptl_crystal_colour             'light yellow'
_exptl_crystal_size_max           0.27
_exptl_crystal_size_mid           0.26 
_exptl_crystal_size_min           0.24 
_exptl_crystal_density_meas       none
_exptl_crystal_density_diffrn     1.438 
_exptl_crystal_density_method     'not measured' 
_exptl_crystal_F_000              1036 
_exptl_absorpt_coefficient_mu     0.944 
_exptl_absorpt_correction_type    none 
_exptl_absorpt_correction_T_min   ? 
_exptl_absorpt_correction_T_max   ? 
_exptl_absorpt_process_details    ? 
 
_exptl_special_details 
; 
 ? 
; 
 
_diffrn_ambient_temperature       293(2) 
_diffrn_radiation_wavelength      0.71073 
_diffrn_radiation_type            MoK\a 
_diffrn_radiation_source          'fine-focus sealed tube' 
_diffrn_radiation_monochromator   graphite 
_diffrn_measurement_device_type   'Rigaku RAXIS-RAPID' 
_diffrn_measurement_method        omega-scan 
_diffrn_detector_area_resol_mean  '10.0' 
_diffrn_standards_number          0 
_diffrn_standards_interval_count  0 
_diffrn_standards_interval_time   0 
_diffrn_standards_decay_%         0 
_diffrn_reflns_number             9472 
_diffrn_reflns_av_R_equivalents   0.0577 
_diffrn_reflns_av_sigmaI/netI     0.0438 
_diffrn_reflns_limit_h_min        -24 
_diffrn_reflns_limit_h_max        24 
_diffrn_reflns_limit_k_min        -12 
_diffrn_reflns_limit_k_max        11 
_diffrn_reflns_limit_l_min        -13 
_diffrn_reflns_limit_l_max        14 
_diffrn_reflns_theta_min          3.05 
_diffrn_reflns_theta_max          24.99 
_reflns_number_total              2230 
_reflns_number_gt                 1996 
_reflns_threshold_expression      >2sigma(I) 
 
_computing_data_collection        'Process-auto' 
_computing_cell_refinement        'Process-auto' 
_computing_data_reduction         'Process-auto'
_computing_structure_solution     'SHELXS-97 (Sheldrick, 1990)' 
_computing_structure_refinement   'SHELXL-97 (Sheldrick, 1997)' 
_computing_molecular_graphics     ? 
_computing_publication_material   ? 
 
_refine_special_details 
; 
 Refinement of F^2^ against ALL reflections.  The weighted R-factor wR and 
 goodness of fit S are based on F^2^, conventional R-factors R are based 
 on F, with F set to zero for negative F^2^. The threshold expression of 
 F^2^ > 2sigma(F^2^) is used only for calculating R-factors(gt) etc. and is 
 not relevant to the choice of reflections for refinement.  R-factors based 
 on F^2^ are statistically about twice as large as those based on F, and R- 
 factors based on ALL data will be even larger. 
; 
 
_refine_ls_structure_factor_coef  Fsqd  
_refine_ls_matrix_type            full 
_refine_ls_weighting_scheme       calc  
_refine_ls_weighting_details 
 'calc w=1/[\s^2^(Fo^2^)+(0.0915P)^2^+14.1173P] where P=(Fo^2^+2Fc^2^)/3' 
_atom_sites_solution_primary      direct 
_atom_sites_solution_secondary    difmap 
_atom_sites_solution_hydrogens    geom 
_refine_ls_hydrogen_treatment     constr
_refine_ls_extinction_method      none 
_refine_ls_extinction_coef        ? 
_refine_ls_number_reflns          2230 
_refine_ls_number_parameters      209 
_refine_ls_number_restraints      48 
_refine_ls_R_factor_all           0.0637 
_refine_ls_R_factor_gt            0.0569 
_refine_ls_wR_factor_ref          0.1615 
_refine_ls_wR_factor_gt           0.1579 
_refine_ls_goodness_of_fit_ref    1.144 
_refine_ls_restrained_S_all       1.132 
_refine_ls_shift/su_max           0.000 
_refine_ls_shift/su_mean          0.000 
 
loop_ 
 _atom_site_label 
 _atom_site_type_symbol 
 _atom_site_fract_x 
 _atom_site_fract_y 
 _atom_site_fract_z 
 _atom_site_U_iso_or_equiv 
 _atom_site_adp_type 
 _atom_site_occupancy 
 _atom_site_symmetry_multiplicity 
 _atom_site_calc_flag 
 _atom_site_refinement_flags 
 _atom_site_disorder_assembly 
 _atom_site_disorder_group 
Cd1 Cd 0.35663(3) 0.5000 0.17446(5) 0.0275(3) Uani 1 2 d S . . 
O1 O 0.4424(2) 0.6498(4) 0.1953(5) 0.0489(13) Uani 1 1 d . . . 
O2 O 0.3465(2) 0.7500(5) 0.1754(5) 0.0569(15) Uani 1 1 d . . . 
N1 N 0.7402(4) 1.0000 0.1304(7) 0.0386(18) Uani 1 2 d S . . 
C1 C 0.7037(13) 0.899(2) 0.114(2) 0.051(6) Uani 0.65 1 d P A 1 
C1' C 0.714(2) 0.880(5) 0.161(5) 0.064(17) Uani 0.35 1 d P . 2 
C2 C 0.6394(5) 0.8879(10) 0.1231(12) 0.035(2) Uani 0.65 1 d P A 1 
C2' C 0.6475(13) 0.886(2) 0.182(2) 0.043(7) Uani 0.35 1 d PU . 2 
C3 C 0.6086(4) 1.0000 0.1481(8) 0.0336(19) Uani 1 2 d S . 2 
C4 C 0.5392(4) 1.0000 0.1610(8) 0.0332(19) Uani 1 2 d S . 2 
C5 C 0.5067(3) 0.8818(6) 0.1687(6) 0.0362(14) Uani 1 1 d . . 2 
H5 H 0.5287 0.8022 0.1674 0.100 Uiso 1 1 calc . B 2 
C6 C 0.4412(3) 0.8819(6) 0.1784(6) 0.0324(13) Uani 1 1 d . . 2 
C7 C 0.4094(4) 1.0000 0.1834(8) 0.0328(19) Uani 1 2 d S . 2 
H7 H 0.3660 1.0000 0.1904 0.100 Uiso 1 2 calc S C 2 
C8 C 0.4078(3) 0.7512(6) 0.1841(6) 0.0365(14) Uani 1 1 d . . 2 
N2 N 0.3589(5) 0.5144(16) 0.3757(6) 0.045(3) Uani 0.50 1 d PG . 2 
C9 C 0.4091(4) 0.4498(14) 0.4592(8) 0.062(5) Uani 0.50 1 d PG . 2 
C10 C 0.4085(4) 0.4490(14) 0.5768(7) 0.066(5) Uani 0.50 1 d PG . 2 
C11 C 0.3577(5) 0.5128(17) 0.6109(6) 0.045(3) Uani 0.50 1 d PG . 2 
C12 C 0.3075(5) 0.5775(15) 0.5273(9) 0.086(6) Uani 0.50 1 d PGU . 2 
C13 C 0.3081(5) 0.5783(15) 0.4097(8) 0.073(5) Uani 0.50 1 d PGU . 2 
N3 N 0.3507(4) 0.5000 0.9719(7) 0.0392(18) Uani 1 2 d S . 2 
C14 C 0.4070(5) 0.5000 0.9429(9) 0.053(3) Uani 1 2 d S . 2 
H14 H 0.4463 0.5000 1.0038 0.100 Uiso 1 2 calc S D 2 
C15 C 0.4126(5) 0.5000 0.8261(9) 0.052(3) Uani 1 2 d S . 2 
H15 H 0.4540 0.5000 0.8104 0.100 Uiso 1 2 calc S E 2 
C16 C 0.3552(5) 0.5000 0.7383(8) 0.043(2) Uani 1 2 d S . 2 
C17 C 0.2949(7) 0.5000 0.7654(13) 0.076(4) Uani 1 2 d SU . 2 
H17 H 0.2549 0.5000 0.7060 0.100 Uiso 1 2 calc S F 2 
C18 C 0.2953(7) 0.5000 0.8821(12) 0.071(3) Uani 1 2 d SU . 2 
H18 H 0.2544 0.5000 0.8998 0.100 Uiso 1 2 calc S G 2 
O1W O 0.5000 1.0000 0.5000 0.058(11) Uani 0.25 4 d SPU . 2 
O2W O 0.460(3) 1.0000 0.510(4) 0.038(11) Uani 0.13 2 d SPU . 2 
O3W O 0.473(2) 1.099(4) 0.508(4) 0.053(10) Uani 0.13 1 d PU . 2 
 
loop_ 
 _atom_site_aniso_label 
 _atom_site_aniso_U_11 
 _atom_site_aniso_U_22 
 _atom_site_aniso_U_33 
 _atom_site_aniso_U_23 
 _atom_site_aniso_U_13 
 _atom_site_aniso_U_12 
Cd1 0.0205(4) 0.0275(4) 0.0378(4) 0.000 0.0135(3) 0.000 
O1 0.036(3) 0.028(2) 0.087(4) -0.003(2) 0.025(3) -0.006(2) 
O2 0.030(2) 0.044(3) 0.104(5) -0.001(3) 0.028(3) -0.010(2) 
N1 0.026(4) 0.038(5) 0.056(5) 0.000 0.018(4) 0.000 
C1 0.029(9) 0.038(13) 0.090(15) -0.006(10) 0.023(10) 0.007(7) 
C1' 0.012(15) 0.028(13) 0.16(5) 0.04(2) 0.03(2) 0.010(10) 
C2 0.018(5) 0.030(5) 0.059(8) -0.010(5) 0.015(5) -0.002(4) 
C2' 0.043(7) 0.043(7) 0.044(7) 0.0001(10) 0.012(2) 0.0001(10) 
C3 0.019(4) 0.034(5) 0.049(5) 0.000 0.012(4) 0.000 
C4 0.022(4) 0.030(4) 0.051(5) 0.000 0.015(4) 0.000 
C5 0.027(3) 0.029(3) 0.056(4) -0.002(3) 0.017(3) 0.000(2) 
C6 0.026(3) 0.032(3) 0.042(3) -0.002(3) 0.014(3) -0.003(2) 
C7 0.017(4) 0.040(5) 0.043(5) 0.000 0.011(4) 0.000 
C8 0.032(3) 0.033(3) 0.050(4) -0.003(3) 0.020(3) -0.007(3) 
N2 0.053(5) 0.051(9) 0.036(5) 0.009(8) 0.021(4) 0.010(9) 
C9 0.055(9) 0.094(14) 0.039(8) 0.004(7) 0.019(7) 0.016(8) 
C10 0.054(9) 0.098(15) 0.050(8) 0.004(8) 0.022(7) 0.027(8) 
C11 0.038(5) 0.057(10) 0.038(6) -0.006(10) 0.009(4) 0.017(11) 
C12 0.086(6) 0.086(6) 0.085(6) 0.0000(10) 0.0235(19) 0.0003(10) 
C13 0.073(5) 0.073(5) 0.073(5) -0.0002(10) 0.0202(16) 0.0004(10) 
N3 0.028(4) 0.059(5) 0.033(4) 0.000 0.013(3) 0.000 
C14 0.031(5) 0.087(8) 0.038(5) 0.000 0.005(4) 0.000 
C15 0.038(5) 0.083(8) 0.039(6) 0.000 0.018(4) 0.000 
C16 0.033(5) 0.069(7) 0.033(5) 0.000 0.018(4) 0.000 
C17 0.076(4) 0.077(4) 0.075(4) 0.000 0.0208(14) 0.000 
C18 0.070(4) 0.072(4) 0.071(4) 0.000 0.0200(14) 0.000 
O1W 0.058(11) 0.058(11) 0.058(11) 0.000 0.016(3) 0.000 
O2W 0.039(11) 0.039(11) 0.038(11) 0.000 0.010(3) 0.000 
O3W 0.053(10) 0.053(10) 0.053(10) -0.0001(10) 0.014(3) 0.0000(10) 
 
_geom_special_details 
; 
 All esds (except the esd in the dihedral angle between two l.s. planes) 
 are estimated using the full covariance matrix.  The cell esds are taken 
 into account individually in the estimation of esds in distances, angles 
 and torsion angles; correlations between esds in cell parameters are only 
 used when they are defined by crystal symmetry.  An approximate (isotropic) 
 treatment of cell esds is used for estimating esds involving l.s. planes. 
; 
 
loop_ 
 _geom_bond_atom_site_label_1 
 _geom_bond_atom_site_label_2 
 _geom_bond_distance 
 _geom_bond_site_symmetry_2 
 _geom_bond_publ_flag 
Cd1 O1 2.307(4) . ? 
Cd1 O1 2.307(4) 6_565 ? 
Cd1 N1 2.337(7) 3_445 ? 
Cd1 N3 2.358(7) 1_554 ? 
Cd1 N2 2.364(6) 6_565 ? 
Cd1 N2 2.364(6) . ? 
Cd1 O2 2.546(6) . ? 
Cd1 O2 2.546(6) 6_565 ? 
Cd1 C8 2.754(6) . ? 
Cd1 C8 2.754(6) 6_565 ? 
O1 C8 1.243(8) . ? 
O2 C8 1.252(7) . ? 
N1 C1 1.26(3) . ? 
N1 C1 1.26(3) 6_575 ? 
N1 C1' 1.42(4) 6_575 ? 
N1 C1' 1.42(4) . ? 
N1 Cd1 2.337(7) 3 ? 
C1 C2 1.38(3) . ? 
C1' C2' 1.47(5) . ? 
C2' C3 1.41(3) . ? 
C3 C2' 1.41(3) 6_575 ? 
C3 C4 1.494(11) . ? 
C4 C5 1.392(7) . ? 
C4 C5 1.392(7) 6_575 ? 
C5 C6 1.399(8) . ? 
C5 H5 0.9300 . ? 
C6 C7 1.379(7) . ? 
C6 C8 1.508(8) . ? 
C7 C6 1.379(7) 6_575 ? 
C7 H7 0.9300 . ? 
N2 N2 0.29(3) 6_565 ? 
N2 C9 1.278(8) 6_565 ? 
N2 C9 1.3900 . ? 
N2 C13 1.3900 . ? 
N2 C13 1.548(18) 6_565 ? 
C9 C9 1.02(3) 6_565 ? 
C9 N2 1.278(11) 6_565 ? 
C9 C10 1.3900 . ? 
C9 C10 1.729(17) 6_565 ? 
C10 C10 1.04(3) 6_565 ? 
C10 C11 1.290(11) 6_565 ? 
C10 C11 1.3900 . ? 
C10 C9 1.729(17) 6_565 ? 
C11 C11 0.26(4) 6_565 ? 
C11 C10 1.290(9) 6_565 ? 
C11 C12 1.3900 . ? 
C11 C16 1.523(11) . ? 
C11 C12 1.530(19) 6_565 ? 
C12 C13 1.3900 . ? 
C12 C11 1.53(2) 6_565 ? 
C12 C12 1.57(3) 6_565 ? 
C13 N2 1.548(19) 6_565 ? 
C13 C13 1.59(3) 6_565 ? 
N3 C14 1.306(12) . ? 
N3 C18 1.337(16) . ? 
N3 Cd1 2.358(7) 1_556 ? 
C14 C15 1.414(14) . ? 
C14 H14 0.9300 . ? 
C15 C16 1.350(14) . ? 
C15 H15 0.9300 . ? 
C16 C17 1.378(17) . ? 
C16 C11 1.523(11) 6_565 ? 
C17 C18 1.37(2) . ? 
C17 H17 0.9300 . ? 
C18 H18 0.9300 . ? 
O1W O2W 0.88(5) 5_676 ? 
O1W O2W 0.88(5) . ? 
O1W O3W 1.17(4) 2_656 ? 
O1W O3W 1.17(4) . ? 
O1W O3W 1.17(4) 5_676 ? 
O1W O3W 1.17(4) 6_575 ? 
O2W O3W 1.05(4) . ? 
O2W O3W 1.05(4) 6_575 ? 
O2W O2W 1.76(10) 5_676 ? 
O2W O3W 1.79(5) 2_656 ? 
O2W O3W 1.79(5) 5_676 ? 
O3W O3W 1.20(8) 2_656 ? 
O3W O2W 1.79(5) 5_676 ? 
 
loop_ 
 _geom_angle_atom_site_label_1 
 _geom_angle_atom_site_label_2 
 _geom_angle_atom_site_label_3 
 _geom_angle 
 _geom_angle_site_symmetry_1 
 _geom_angle_site_symmetry_3 
 _geom_angle_publ_flag 
O1 Cd1 O1 82.5(2) . 6_565 ? 
O1 Cd1 N1 138.57(12) . 3_445 ? 
O1 Cd1 N1 138.57(12) 6_565 3_445 ? 
O1 Cd1 N3 86.12(19) . 1_554 ? 
O1 Cd1 N3 86.12(19) 6_565 1_554 ? 
N1 Cd1 N3 90.6(3) 3_445 1_554 ? 
O1 Cd1 N2 97.6(3) . 6_565 ? 
O1 Cd1 N2 92.9(4) 6_565 6_565 ? 
N1 Cd1 N2 87.6(3) 3_445 6_565 ? 
N3 Cd1 N2 176.0(4) 1_554 6_565 ? 
O1 Cd1 N2 92.9(4) . . ? 
O1 Cd1 N2 97.6(3) 6_565 . ? 
N1 Cd1 N2 87.6(3) 3_445 . ? 
N3 Cd1 N2 176.0(4) 1_554 . ? 
N2 Cd1 N2 7.1(8) 6_565 . ? 
O1 Cd1 O2 53.53(15) . . ? 
O1 Cd1 O2 135.97(15) 6_565 . ? 
N1 Cd1 O2 85.34(10) 3_445 . ? 
N3 Cd1 O2 91.32(13) 1_554 . ? 
N2 Cd1 O2 92.1(4) 6_565 . ? 
N2 Cd1 O2 85.0(4) . . ? 
O1 Cd1 O2 135.97(15) . 6_565 ? 
O1 Cd1 O2 53.53(15) 6_565 6_565 ? 
N1 Cd1 O2 85.34(10) 3_445 6_565 ? 
N3 Cd1 O2 91.32(13) 1_554 6_565 ? 
N2 Cd1 O2 85.0(4) 6_565 6_565 ? 
N2 Cd1 O2 92.1(4) . 6_565 ? 
O2 Cd1 O2 170.3(2) . 6_565 ? 
O1 Cd1 C8 26.60(17) . . ? 
O1 Cd1 C8 109.04(18) 6_565 . ? 
N1 Cd1 C8 112.05(13) 3_445 . ? 
N3 Cd1 C8 87.38(15) 1_554 . ? 
N2 Cd1 C8 96.6(4) 6_565 . ? 
N2 Cd1 C8 90.0(4) . . ? 
O2 Cd1 C8 26.97(16) . . ? 
O2 Cd1 C8 162.56(17) 6_565 . ? 
O1 Cd1 C8 109.04(18) . 6_565 ? 
O1 Cd1 C8 26.60(17) 6_565 6_565 ? 
N1 Cd1 C8 112.05(13) 3_445 6_565 ? 
N3 Cd1 C8 87.38(15) 1_554 6_565 ? 
N2 Cd1 C8 90.0(4) 6_565 6_565 ? 
N2 Cd1 C8 96.6(4) . 6_565 ? 
O2 Cd1 C8 162.56(17) . 6_565 ? 
O2 Cd1 C8 26.97(16) 6_565 6_565 ? 
C8 Cd1 C8 135.6(3) . 6_565 ? 
C8 O1 Cd1 97.2(4) . . ? 
C8 O2 Cd1 85.8(4) . . ? 
C1 N1 C1 109(2) . 6_575 ? 
C1 N1 C1' 118.5(12) . 6_575 ? 
C1 N1 C1' 24(3) 6_575 6_575 ? 
C1 N1 C1' 24(3) . . ? 
C1 N1 C1' 118.5(12) 6_575 . ? 
C1' N1 C1' 118(4) 6_575 . ? 
C1 N1 Cd1 125.4(11) . 3 ? 
C1 N1 Cd1 125.4(11) 6_575 3 ? 
C1' N1 Cd1 113.1(16) 6_575 3 ? 
C1' N1 Cd1 113.1(16) . 3 ? 
N1 C1 C2 128(2) . . ? 
N1 C1' C2' 117(3) . . ? 
C3 C2' C1' 119(2) . . ? 
C2' C3 C2' 111(2) 6_575 . ? 
C2' C3 C4 118.2(11) 6_575 . ? 
C2' C3 C4 118.2(11) . . ? 
C5 C4 C5 119.0(7) . 6_575 ? 
C5 C4 C3 120.5(4) . . ? 
C5 C4 C3 120.5(4) 6_575 . ? 
C4 C5 C6 120.4(6) . . ? 
C4 C5 H5 119.8 . . ? 
C6 C5 H5 119.8 . . ? 
C7 C6 C5 119.7(5) . . ? 
C7 C6 C8 122.0(5) . . ? 
C5 C6 C8 118.4(5) . . ? 
C6 C7 C6 120.8(7) 6_575 . ? 
C6 C7 H7 119.6 6_575 . ? 
C6 C7 H7 119.6 . . ? 
O1 C8 O2 123.3(6) . . ? 
O1 C8 C6 118.2(5) . . ? 
O2 C8 C6 118.6(6) . . ? 
O1 C8 Cd1 56.2(3) . . ? 
O2 C8 Cd1 67.2(4) . . ? 
C6 C8 Cd1 172.1(4) . . ? 
N2 N2 C9 106.5(12) 6_565 6_565 ? 
N2 N2 C9 61.8(5) 6_565 . ? 
C9 N2 C9 44.7(12) 6_565 . ? 
N2 N2 C13 117.8(5) 6_565 . ? 
C9 N2 C13 99.9(7) 6_565 . ? 
C9 N2 C13 120.0 . . ? 
N2 N2 C13 52.6(9) 6_565 6_565 ? 
C9 N2 C13 116.5(7) 6_565 6_565 ? 
C9 N2 C13 88.0(5) . 6_565 ? 
C13 N2 C13 65.2(9) . 6_565 ? 
N2 N2 Cd1 86.4(4) 6_565 . ? 
C9 N2 Cd1 125.4(7) 6_565 . ? 
C9 N2 Cd1 119.1(6) . . ? 
C13 N2 Cd1 120.7(5) . . ? 
C13 N2 Cd1 113.3(11) 6_565 . ? 
C9 C9 N2 73.5(14) 6_565 6_565 ? 
C9 C9 C10 90.3 6_565 . ? 
N2 C9 C10 122.8(2) 6_565 . ? 
C9 C9 N2 61.8 6_565 . ? 
N2 C9 N2 11.7(14) 6_565 . ? 
C10 C9 N2 120.0 . . ? 
C9 C9 C10 53.5(8) 6_565 6_565 ? 
N2 C9 C10 105.4(11) 6_565 6_565 ? 
C10 C9 C10 36.8(8) . 6_565 ? 
N2 C9 C10 96.8(5) . 6_565 ? 
C10 C10 C11 72.5(15) 6_565 6_565 ? 
C10 C10 C9 89.7 6_565 . ? 
C11 C10 C9 122.7(3) 6_565 . ? 
C10 C10 C11 62.2 6_565 . ? 
C11 C10 C11 10.3(15) 6_565 . ? 
C9 C10 C11 120.0 . . ? 
C10 C10 C9 53.5(7) 6_565 6_565 ? 
C11 C10 C9 104.9(12) 6_565 6_565 ? 
C9 C10 C9 36.1(7) . 6_565 ? 
C11 C10 C9 97.3(5) . 6_565 ? 
C11 C11 C10 107.5(12) 6_565 6_565 ? 
C11 C11 C12 118.2 6_565 . ? 
C10 C11 C12 99.2(7) 6_565 . ? 
C11 C11 C10 62.2 6_565 . ? 
C10 C11 C10 45.3(12) 6_565 . ? 
C12 C11 C10 120.0 . . ? 
C11 C11 C16 85.1(12) 6_565 . ? 
C10 C11 C16 125.8(10) 6_565 . ? 
C12 C11 C16 121.2(7) . . ? 
C10 C11 C16 118.6(8) . . ? 
C11 C11 C12 53.2(10) 6_565 6_565 ? 
C10 C11 C12 117.0(7) 6_565 6_565 ? 
C12 C11 C12 64.9(9) . 6_565 ? 
C10 C11 C12 88.6(5) . 6_565 ? 
C16 C11 C12 112.5(14) . 6_565 ? 
C11 C12 C13 120.0 . . ? 
C11 C12 C11 8.6(11) . 6_565 ? 
C13 C12 C11 117.1(4) . 6_565 ? 
C11 C12 C12 61.8 . 6_565 ? 
C13 C12 C12 90.3 . 6_565 ? 
C11 C12 C12 53.2(11) 6_565 6_565 ? 
C12 C13 N2 120.0 . . ? 
C12 C13 N2 116.6(5) . 6_565 ? 
N2 C13 N2 9.6(10) . 6_565 ? 
C12 C13 C13 89.7 . 6_565 ? 
N2 C13 C13 62.2 . 6_565 ? 
N2 C13 C13 52.6(10) 6_565 6_565 ? 
C14 N3 C18 115.8(9) . . ? 
C14 N3 Cd1 117.5(6) . 1_556 ? 
C18 N3 Cd1 126.6(7) . 1_556 ? 
N3 C14 C15 125.0(9) . . ? 
N3 C14 H14 117.5 . . ? 
C15 C14 H14 117.5 . . ? 
C16 C15 C14 117.1(9) . . ? 
C16 C15 H15 121.4 . . ? 
C14 C15 H15 121.4 . . ? 
C15 C16 C17 119.6(10) . . ? 
C15 C16 C11 119.7(8) . . ? 
C17 C16 C11 120.5(10) . . ? 
C15 C16 C11 119.7(9) . 6_565 ? 
C17 C16 C11 120.5(10) . 6_565 ? 
C11 C16 C11 9.8(13) . 6_565 ? 
C18 C17 C16 118.4(13) . . ? 
C18 C17 H17 120.8 . . ? 
C16 C17 H17 120.8 . . ? 
N3 C18 C17 124.0(13) . . ? 
N3 C18 H18 118.0 . . ? 
C17 C18 H18 118.0 . . ? 
O2W O1W O2W 180.0(9) 5_676 . ? 
O2W O1W O3W 59(2) 5_676 2_656 ? 
O2W O1W O3W 120.6(19) . 2_656 ? 
O2W O1W O3W 121(2) 5_676 . ? 
O2W O1W O3W 59(2) . . ? 
O3W O1W O3W 61(4) 2_656 . ? 
O2W O1W O3W 59(2) 5_676 5_676 ? 
O2W O1W O3W 121(2) . 5_676 ? 
O3W O1W O3W 119(4) 2_656 5_676 ? 
O3W O1W O3W 180.000(16) . 5_676 ? 
O2W O1W O3W 120.6(19) 5_676 6_575 ? 
O2W O1W O3W 59(2) . 6_575 ? 
O3W O1W O3W 180(3) 2_656 6_575 ? 
O3W O1W O3W 119(4) . 6_575 ? 
O3W O1W O3W 61(4) 5_676 6_575 ? 
O1W O2W O3W 75(4) . . ? 
O1W O2W O3W 75(4) . 6_575 ? 
O3W O2W O3W 149(7) . 6_575 ? 
O1W O2W O2W 0.0(4) . 5_676 ? 
O3W O2W O2W 75(4) . 5_676 ? 
O3W O2W O2W 75(4) 6_575 5_676 ? 
O1W O2W O3W 34.4(16) . 2_656 ? 
O3W O2W O3W 40(3) . 2_656 ? 
O3W O2W O3W 109(4) 6_575 2_656 ? 
O2W O2W O3W 34.4(16) 5_676 2_656 ? 
O1W O2W O3W 34.4(16) . 5_676 ? 
O3W O2W O3W 109(4) . 5_676 ? 
O3W O2W O3W 40(3) 6_575 5_676 ? 
O2W O2W O3W 34.4(16) 5_676 5_676 ? 
O3W O2W O3W 69(3) 2_656 5_676 ? 
O2W O3W O1W 46(3) . . ? 
O2W O3W O3W 105(4) . 2_656 ? 
O1W O3W O3W 59(2) . 2_656 ? 
O2W O3W O2W 71(4) . 5_676 ? 
O1W O3W O2W 25.0(14) . 5_676 ? 
O3W O3W O2W 34.4(16) 2_656 5_676 ? 
 
_diffrn_measured_fraction_theta_max    0.998 
_diffrn_reflns_theta_full              24.99 
_diffrn_measured_fraction_theta_full   0.998 
_refine_diff_density_max    1.169 
_refine_diff_density_min   -0.889 
_refine_diff_density_rms    0.157 

#=================================================================end
